# Supplementary material for: Under-oil superhydrophilic salt particle filter for the efficient separation of water-in-oil emulsions
Source: Royal Society of Chemistry journal article supplement (doi:10.1039/d0cc04290k), 2020-01-01
Supplement: d0cc04290k1.pdf [file d0cc04290k1.pdf]

Supplementary materials for

## **Under-oil Superhydrophilic Salt Particle Filter for Efficient Separation of Water-in-oil Emulsions**

Bao Wang<sup>a,b</sup>, Awais Mahmood<sup>b</sup>, Lei Chen<sup>\*b</sup>, Ding Weng<sup>b</sup>, Caihua Wang<sup>a</sup>, Chaolang Chen<sup>b</sup>,  
Zhaoxin Li<sup>b</sup>, and Jiadao Wang<sup>b</sup>

- a. Northeast Petroleum University, Daqing 163318, China.
- b. State Key Laboratory of Tribology, Tsinghua University, Beijing 100084, China.

## Materials and Methods

Reagent grade (99.5 %) NaCl was used as a water-in-oil emulsion filtration bed. The NaCl and the surfactant sodium dodecyl sulfate (SDS) were purchased from J&K Scientific and are utilized in their original form to produce surfactant stabilized water-in-oil emulsion. The n-decane was used as an oil compound in this study and was purchased from J&K Scientific. All the aqueous solutions produced in this study were made with deionized (DI) water. Methylene blue (AR grade) was purchased from Aladdin.

## Supplementary Figures

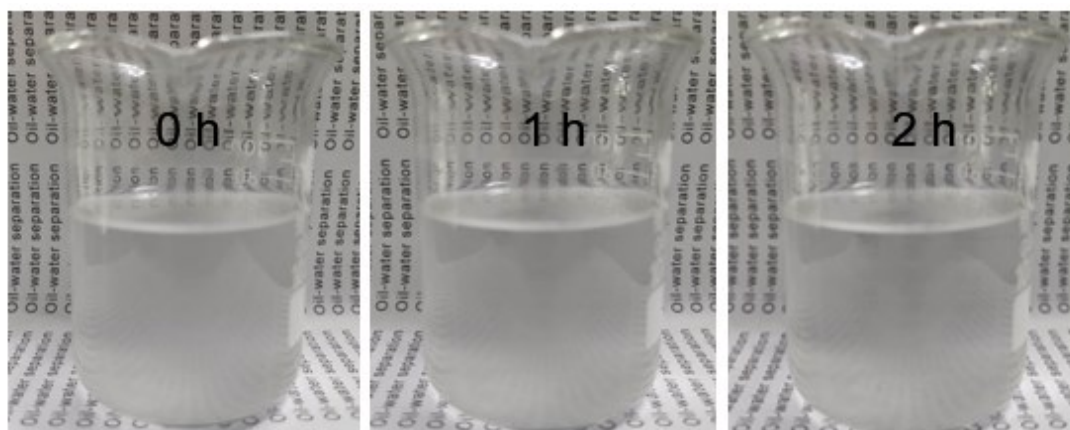

**Figure S1** The stability tests of water-in-decane emulsion.

## Supplementary Movies

**Movie S1:** Video shows different flux between the suction filtration and filtration by gravity.
